# Supplementary material for: The role of undifferentiated adipose-derived stem cells in peripheral nerve repair
Source: PubMed Central journal article supplement — Neural Regen Res. 2018 May;13(5):757–63. doi: 10.4103/1673-5374.232457 (PMC5998619; doi:10.4103/1673-5374.232457), 2018-05
Supplement: NRR-13-757_Suppl1.pdf [file NRR-13-757_Suppl1.pdf]

#### PubMed Search Strategy

- (("Adipose tissue"[MeSH] OR "adipocytes"[MeSH Terms] OR "adipose-derived"[TIAB]) AND "Nerve regeneration\*"[MeSH] AND ("STEM CELLS"[MeSH] OR (stem cell[TIAB] OR stem cellbanker[TIAB] OR stem cellbankertrade[TIAB] OR stem cellbased[TIAB] OR stem cellness[TIAB] OR stem cells[TIAB] OR stem cells's[TIAB] OR stem cells,[TIAB] OR stem cells2013[TIAB] OR stem celltransplantation[TIAB] OR stem cellulose[TIAB]) OR "Schwann Cells"[MeSH]) NOT "Spinal Cord Injuries"[MeSH]) NOT REVIEW[PT] AND ("2008/01/01"[PDAT] : "2018/04/07"[PDAT]) → 96 results returned
